# Supplementary material for: A Shared Genetic Propensity Underlies Experiences of Bullying Victimization in Late Childhood and Self-Rated Paranoid Thinking in Adolescence
Source: PubMed Central journal article supplement (PMC4393686; doi:10.1093/schbul/sbu142), 2014-10-16
Supplement: supp_sbu142_SHAKOOR_Resubmission_Shakoor_Bullying_PEs_Supplementary_28August14.pdf [file supp_sbu142_SHAKOOR_Resubmission_Shakoor_Bullying_PEs_Supplementary_28August14.pdf]

**Supplementary material**

Table 1: Intraclass Twin Correlations split by gender

|                                     | MZ                | DZ                |
|-------------------------------------|-------------------|-------------------|
|                                     | ICC (CI)          | ICC (CI)          |
| <b>Total sample</b>                 |                   |                   |
| Univariate twin correlations        |                   |                   |
| Paranoia                            | 0.52 (0.49, 0.56) | 0.29 (0.24, 0.33) |
| Bullying victimization              | 0.62 (0.58, 0.65) | 0.42 (0.37, 0.46) |
| Cross-trait cross-twin correlation  |                   |                   |
| Paranoia and bullying victimization | 0.26 (0.21, 0.31) | 0.12 (0.07, 0.18) |
| <b>Males</b>                        |                   |                   |
| Univariate twin correlations        |                   |                   |
| Paranoia                            | 0.48 (0.42, 0.53) | 0.27 (0.20, 0.34) |
| Bullying victimization              | 0.59 (0.54, 0.65) | 0.43 (0.36, 0.49) |
| Cross-trait cross-twin correlation  |                   |                   |
| Paranoia and bullying victimization | 0.25 (0.17, 0.33) | 0.12 (0.03, 0.20) |
| <b>Females</b>                      |                   |                   |
| Univariate twin correlations        |                   |                   |
| Paranoia                            | 0.55 (0.51, 0.59) | 0.30 (0.24, 0.36) |
| Bullying victimization              | 0.63 (0.59, 0.67) | 0.41 (0.35, 0.47) |
| Cross-trait cross-twin correlation  |                   |                   |
| Paranoia and bullying victimization | 0.27 (0.21, 0.33) | 0.13 (0.06, 0.20) |

Note: Intraclass correlations using transformed standardized age and sex regressed scales. ICC= Intraclass correlations  
CI= confidence intervals.

Table 2: Paranoia age-16 and bullying victimization age-12: Phenotypic correlations adjusting for confounders

|                                           | Paranoia<br><b>r (95%CI)</b> |
|-------------------------------------------|------------------------------|
| Unadjusted bullying victimization age -12 | 0.26 (0.23, 0.28)            |
| Anxiety age-12                            | 0.24 (0.22, 0.27)            |
| Depression age-12                         | 0.23 (0.20, 0.25)            |
| Bullying victimization age-16             | 0.14 (0.09, 0.18)            |
| Cannabis use age-16                       | 0.25 (0.22, 0.28)            |
| Neuroticism age-16                        | 0.21 (0.17, 0.25)            |
| Extraversion age-16                       | 0.27 (0.23, 0.31)            |
| Openness age-16                           | 0.28 (0.24, 0.31)            |
| Agreeableness age-16                      | 0.27 (0.23, 0.31)            |
| Conscientiousness age-16                  | 0.27 (0.23, 0.31)            |
| Unadjusted bullying victimization age-12  | 0.26 (0.23, 0.28)            |

Note: Correlations were performed using one random member of each twin pair using standardized age and sex regressed residuals.  $r$  = Pearson's correlation, CI= confidence intervals.
